# Supplementary material for: Short Neuropeptide F and Its Receptor Regulate Feeding Behavior in Pea Aphid (Acyrthosiphon pisum)
Source: MDPI journal article supplement (doi:10.3390/insects13030282), 2022-03-13
Supplement: s1 [file s1]

Supplementary Materials

# Short Neuropeptide F and Its Receptor Regulate Feeding Behavior in Pea Aphid (*Acyrtosiphon Pisum*)

Muhammad Bilal Amir, Yan Shi, Hehe Cao, Muhammad Yasir Ali, Muhammad Afaq Ahmed, Guy Smagghe and Tong-Xian Liu

**Table S1.** The specific primers used in qRT-PCR and dsRNA synthesis.

| Usage           | Primer Name | Primer Sequences                                   |
|-----------------|-------------|----------------------------------------------------|
| qRT-PCR         | sNPF-F      | GCAGCCGTTGTGTGTACTCT                               |
| qRT-PCR         | sNPF-R      | CGGAGATCTCTGGTTTTTGC                               |
| qRT-PCR         | sNPFR-F     | GTGGCTGAACGAGAACTTCC                               |
| qRT-PCR         | sNPFR-R     | AAGCCGGTGCAGTCTGTAGT                               |
| qRT-PCR         | RPL7-F      | GCGCGCCGAGGCTTAT                                   |
| qRT-PCR         | RPL7-R      | CCGGATTTCTTTGCATTTCCTG                             |
| dsRNA synthesis | sNPF-F      | <b>TAATACGACTCACTATAGGGT</b> TGGACTACGAGAATGCCAAAG |
| dsRNA synthesis | sNPF-R      | <b>TAATACGACTCACTATAGGGC</b> TTAACCTCAGCGACGGA     |
| dsRNA synthesis | sNPFR-F     | <b>TAATACGACTCACTATAGGG</b> AAACGCTGTTGCCCACG      |
| dsRNA synthesis | sNPFR-R     | <b>TAATACGACTCACTATAGGG</b> CACTTCGACTGCATCCTGATT  |
| dsRNA synthesis | GFP-F       | <b>TAATACGACTCACTATAGGG</b> TGACCACCCTGACCTAC      |
| dsRNA synthesis | GFP-R       | <b>TAATACGACTCACTATAGGG</b> TTGATGCCGTTCTTCTGC     |

The bold capital letter shows the T7 RNA polymerase promoter sequence.

**Table S2.** Accession numbers of the sequences used for the gene structure analysis.

| Species name                   | mRNA           | Protein        | Genome         |
|--------------------------------|----------------|----------------|----------------|
| <i>Acyrtosiphon pisum</i>      | XM_003247202.3 | XP_003247250.1 | NC_042494.1    |
| <i>Myzus persicae</i>          | XM_022314068.1 | XP_022169760.1 | NW_019102905.1 |
| <i>Nilaparvata lugens</i>      | XM_022328849.1 | XP_022184541.1 | NW_019105702   |
| <i>Drosophila melanogaster</i> | NM_165316.2    | NP_724239.1    | NT_033779.5    |
| <i>Aedes albopictus</i>        | XM_029872461.1 | XP_029728321.1 | NW_021838233.1 |
| <i>Bombyx mori</i>             | NM_001134257.1 | NP_001127729.1 | NW_004581726.1 |
| <i>Spodoptera frugiperda</i>   | XM_035582761.1 | XP_035438654.1 | NC_049720.1    |
| <i>Tribolium castaneum</i>     | XM_008200483.2 | XP_008198705.1 | NC_007425.3    |
| <i>Aethina tumida</i>          | XM_020019114.1 | XP_019874673.1 | NW_017853357.1 |
| <i>Apis mellifera</i>          | XM_003250107.4 | XP_003250155.1 | NC_037641.1    |
| <i>Camponotus floridanus</i>   | XM_011260741.2 | XP_011259043.1 | NW_020229547.1 |

**Table S3.** Accession numbers of the sequences used for phylogenetic relationship analysis.

| <b>Species name-sNPF</b>       | <b>Accession number</b> |
|--------------------------------|-------------------------|
| <i>Acyrtosiphon pisum</i>      | XP_003247250.1          |
| <i>Apis mellifera</i>          | XP_003250155.1          |
| <i>Bombus bifarius</i>         | XP_033296993.1          |
| <i>Osmia lignaria</i>          | XM_034317951.1          |
| <i>Camponotus floridanus</i>   | XP_011259043.1          |
| <i>Aphis craccivora</i>        | KAF0767496.1            |
| <i>Drosophila melanogaster</i> | NP_724239.1             |
| <i>Bactrocera dorsalis</i>     | KY652383                |
| <i>Zeugodacus cucurbitae</i>   | XM_011192244.2          |
| <i>Eumeta japonica</i>         | GBP76345.1              |
| <i>Bombyx mori</i>             | NP_001127729.1          |
| <i>Manduca sexta</i>           | XM_030172318.1          |
| <i>Spodoptera littoralis</i>   | JQ646093.1              |
| <i>Helicoverpa armigera</i>    | XM_021333218.1          |
| <b>Species name-sNPFR</b>      | <b>Accession number</b> |
| <i>Acyrtosiphon pisum</i>      | XM_029489088.1          |
| <i>Bombus terrestris</i>       | XM_020864331.1          |
| <i>Apis mellifera</i>          | XM_006561685.3          |
| <i>Harpegnathos saltator</i>   | EFN78163.1              |
| <i>Solenopsis invicta</i>      | AAV88918                |
| <i>Bombyx mori</i>             | NM_001134235.1          |
| <i>Tribolium castaneum</i>     | XP_966794               |
| <i>Nilaparvata lugens</i>      | XM_039439868.1          |
| <i>Drosophila melanogaster</i> | NP_524176               |
| <i>Bactrocera dorsalis</i>     | KY652384.1              |
| <i>Mus musculus</i>            | NP_963909.2             |
| <i>Oreochromis niloticus</i>   | XM_025909417.1          |
| <i>Oncorhynchus kisutch</i>    | XM_020463106.2          |
| <i>Danio rerio</i>             | AAZ04130.1              |
| <i>Loa loa</i>                 | XM_020451317.1          |

**Table S4.** Table represents the Ct values of qRT-PCR obtained in fed and starvation experiment. Reverse transcription-polymerase chain reaction (RT-PCR) analysis of starvation with sNPF (A) and sNPFR (B) compared with the expression of ribosomal protein L7 (RPL7).

| <b>Sample</b> | <b>Gene</b> | <b>Ct value</b> |                       |            |                       |
|---------------|-------------|-----------------|-----------------------|------------|-----------------------|
|               |             | <b>Fed</b>      | <b>3 h starvation</b> | <b>Fed</b> | <b>6 h starvation</b> |
| Adult         | sNPF        | 28.18           | 27.75                 | 28.56      | 26.47                 |
|               | RPL 7       | 23.18           | 24.30                 | 23.78      | 24.13                 |
| CNS           | sNPF        | 27.95           | 26.94                 | 28.47      | 25.31                 |
|               | RPL 7       | 23.26           | 23.86                 | 24.26      | 23.69                 |
| Adult         | sNPFR       | 28.27           | 27.70                 | 28.61      | 26.85                 |
|               | RPL 7       | 23.92           | 24.61                 | 25.44      | 25.77                 |
| CNS           | sNPFR       | 28.29           | 27.61                 | 28.41      | 26.29                 |
|               | RPL 7       | 23.55           | 24.42                 | 23.65      | 23.90                 |

**Table S5.** Ct values of qRT-PCR obtained from spatio-temporal expression (A) and gene silencing experiment (B).

| Ct value-A |            |            |            |            |          |          |
|------------|------------|------------|------------|------------|----------|----------|
| Gene       | Antennae   | Brain      | integument | Embryos    | Midgut   |          |
| sNPF       | 31.08      | 23.06      | 30.17      | 26.44      | 32.62    |          |
| RPL7       | 19.34      | 18.51      | 20.87      | 18.46      | 18.35    |          |
|            | 1st Instar | 2nd Instar | 3rd Instar | 4th Instar | Adult    |          |
| sNPF       | 22.64      | 25.67      | 25.29      | 26.34      | 24.57    |          |
| RPL7       | 18.60      | 20.29      | 19.34      | 19.85      | 18.25    |          |
|            | Antennae   | Brain      | integument | Embryos    | Midgut   |          |
| sNPFR      | 26.29      | 23.25      | 26.14      | 28.06      | 26.03    |          |
| RPL7       | 18.77      | 18.11      | 17.29      | 17.50      | 18.46    |          |
|            | 1st Instar | 2nd Instar | 3rd Instar | 4th Instar | Adult    |          |
| sNPFR      | 23.05      | 26.24      | 26.07      | 25.81      | 25.27    |          |
| RPL7       | 18.39      | 20.50      | 18.84      | 19.85      | 19.10    |          |
| Ct value-B |            |            |            |            |          |          |
| Time       | 6 hours    | 12 hours   | 24 hours   | 36 hours   | 48 hours | 72 hours |
| sNPF       | 26.88      | 27.92      | 27.18      | 24.83      | 20.42    | 20.93    |
| RPL7       | 21.01      | 21.33      | 20.84      | 18.45      | 14.56    | 15.54    |
| Time       | 6 hours    | 12 hours   | 24 hours   | 36 hours   | 48 hours | 72 hours |
| GFP        | 19.70      | 19.83      | 20.57      | 20.48      | 21.74    | 21.92    |
| RPL7       | 13.87      | 14.66      | 15.27      | 14.84      | 16.37    | 16.77    |
| Time       | 6 hours    | 12 hours   | 24 hours   | 36 hours   | 48 hours | 72 hours |
| sNPFR      | 23.34      | 27.29      | 27.45      | 27.46      | 27.32    | 27.47    |
| RPL7       | 10.42      | 15.02      | 15.91      | 15.57      | 17.12    | 18.24    |
| Time       | 6 hours    | 12 hours   | 24 hours   | 36 hours   | 48 hours | 72 hours |
| GFP        | 27.60      | 27.31      | 27.29      | 27.34      | 27.27    | 26.83    |
| RPL7       | 14.97      | 15.61      | 16.12      | 15.67      | 17.13    | 17.42    |

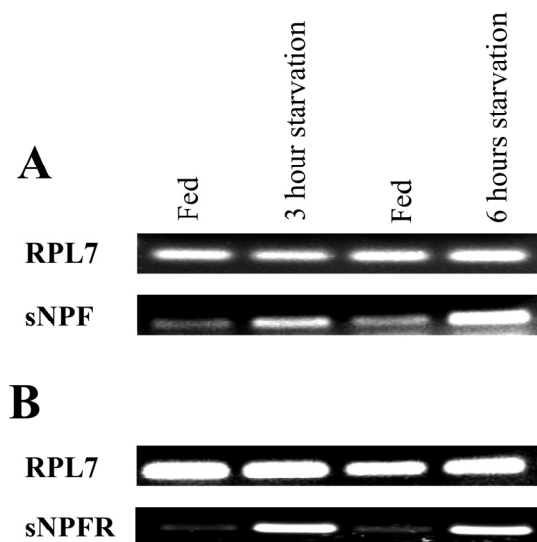

**Figure S1.** Reverse transcription-polymerase chain reaction (RT-PCR) analysis of starvation with sNPF (A) and sNPFR (B) compared with the expression of ribosomal protein L7 (RPL7).
